# Supplementary material for: Linear triatomic [ZnBi2]4− in K4ZnBi2
Source: Royal Society of Chemistry journal article supplement (doi:10.1039/c3dt53419g), 2014-01-01
Supplement: c3dt53419g.pdf [file c3dt53419g.pdf]

## Supporting information

### Linear Triatomic $[\text{ZnBi}_2]^{4-}$ in $\text{K}_4\text{ZnBi}_2$

Qian Qin, Liujiang Zhou, Yi Wang, Ruili Sang, Li Xu\*

State Key Laboratory of Structural Chemistry, Fujian Institute of Research on the Structure of Matter,  
Chinese Academy of Sciences, Fuzhou, Fujian, 350002.

#### 1.1 Synthesis

All the chemicals were obtained from commercial sources and was handled in  $\text{N}_2$  atmosphere using an  $\text{N}_2$ -filled glovebox. K was purified by liquating, Zn powder (99.99%, ChemPur) and Bi granules (99.99%, ChemPur) were used as received.

$\text{K}_4\text{ZnBi}_2$  are obtained unexpected by reactions of the K, Zn and Bi elements at the rate of 3:1:2 in welded niobium containers that were sealed in an evacuated fused silica jacket (20mm i.d.) under high vacuum (ca.  $10^{-3}$  Pa). The assembly were heated at  $700^\circ\text{C}$  for 2 days and then cooled to room temperature, with isothermal dwelling times of 48 hours at  $450^\circ\text{C}$ . A cooling rate of  $5^\circ\text{C h}^{-1}$  was used for the steps  $700^\circ\text{C}$  to  $450^\circ\text{C}$  and  $450^\circ\text{C}$  to room temperature.

The pure powder of  $\text{K}_4\text{ZnBi}_2$  are synthesized by reactions of the stoichiometric proportions of the elements in welded niobium containers that were sealed in an evacuated fused silica jacket (20mm i.d.) under high vacuum (ca.  $10^{-3}$  Pa). And then heated to  $700^\circ\text{C}$  in 2 hours. The sample was stayed at  $700^\circ\text{C}$  for 2 days, then quickly putted into cold water.

#### 1.2 The data collection

The intensity data were collected on a Rigaku Mercury CCD diffractometer with graphite-monochromated  $\text{MoK}\alpha$  radiation ( $\lambda = 0.71073 \text{ \AA}$ ) at room temperature. All absorption corrections were performed using multiscan. The structure was solved by direct methods and refined by full-matrix least-squares on  $F^2$  with the SHELXTL-97 program package.

#### 1.3 X-ray Powder Diffraction

The sample was assessed for phase purity using powder X-ray diffraction. As the sample of  $\text{K}_4\text{ZnBi}_2$  is sensitive to air and moisture, it was protected by the Magic Tape when it was tested. XRD pattern were collected on a Rigaku DMAX 2500 powder diffractometer with ultra 18 Kw Cu  $\text{K}\alpha$  radiation. The dates are treated by jade 6.0.

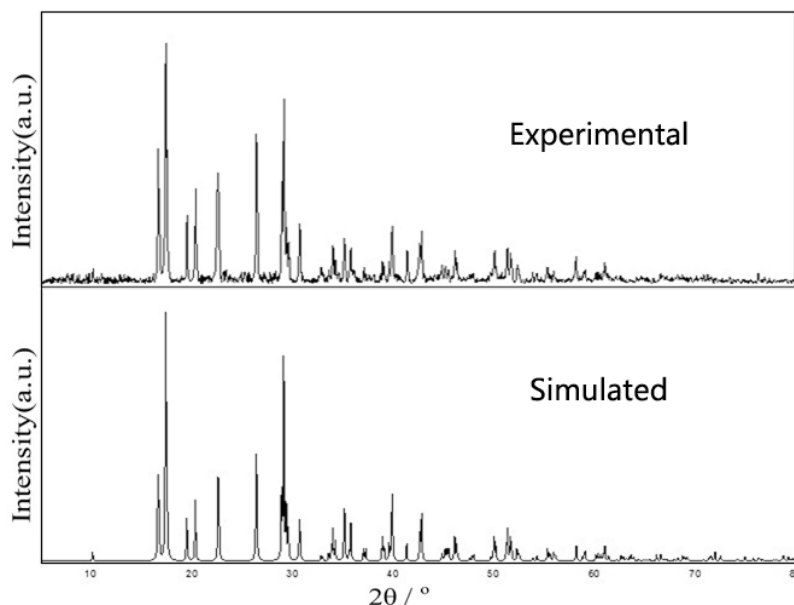

**Fig. S1** Experimental and simulated X-ray powder diffraction patterns of  $K_4ZnBi_2$ .

### 1.4 Computational descriptions

First principle studies of band structures and density of states (DOS) were performed by using the projector augmented wave (PAW) method,<sup>1</sup> as implemented in the Vienna ab initio simulation package (VASP)<sup>2</sup>. The Perdew-Burke-Ernzerhof (PBE)<sup>3</sup> functional of the generalized gradient approximations (GGA)<sup>4</sup> was employed as the exchange-correlation function. The valence atomic configurations were  $3s^23p^64s^1$ ,  $3d^{10}4s^2$ ,  $5d^{10}6s^26p^3$ , for K, Zn, and Bi, respectively. The plane-wave cutoff energy of 277 eV and the threshold of  $10^{-5}$  eV were set for the self-consistent-field convergence of the total electronic energy. For DOS calculations, we used a  $9 \times 9 \times 3$  Monkhorst-Pack k-point grid within the Brillouin zone.

1. G. Kresse and D. Joubert, *Physical Review B* 1999, **59**, 1758.
2. G. Kresse and J. Furthmüller, *Physical Review B* 1996, **54**, 11169.
3. J. P. Perdew, K. Burke and M. Ernzerhof, *Phys Rev Lett* 1996, **77**, 3865.
4. J. P. Perdew and Y. Wang, *Physical Review B* 1992, **45**, 13244.

## 2. Crystal structure determination

### *Space group determination*

Mean  $|E \times E - 1| = 0.566$  [expected 0.968 centrosymmetry and 0.736 non-centrosymmetry]

Systematic absence exceptions:

|                       | c--   | n--   | -c-   | -n-   | --a   | --b   | --21       |
|-----------------------|-------|-------|-------|-------|-------|-------|------------|
| N                     | 231   | 231   | 117   | 117   | 58    | 58    | 21         |
| N( $I > 3s$ )         | 146   | 146   | 72    | 72    | 37    | 37    | 2          |
| $\langle I \rangle$   | 316.7 | 316.7 | 452.3 | 452.3 | 615.1 | 615.1 | 5.0        |
| $\langle I/s \rangle$ | 7.8   | 7.8   | 7.1   | 7.1   | 8.0   | 8.0   | <b>0.8</b> |

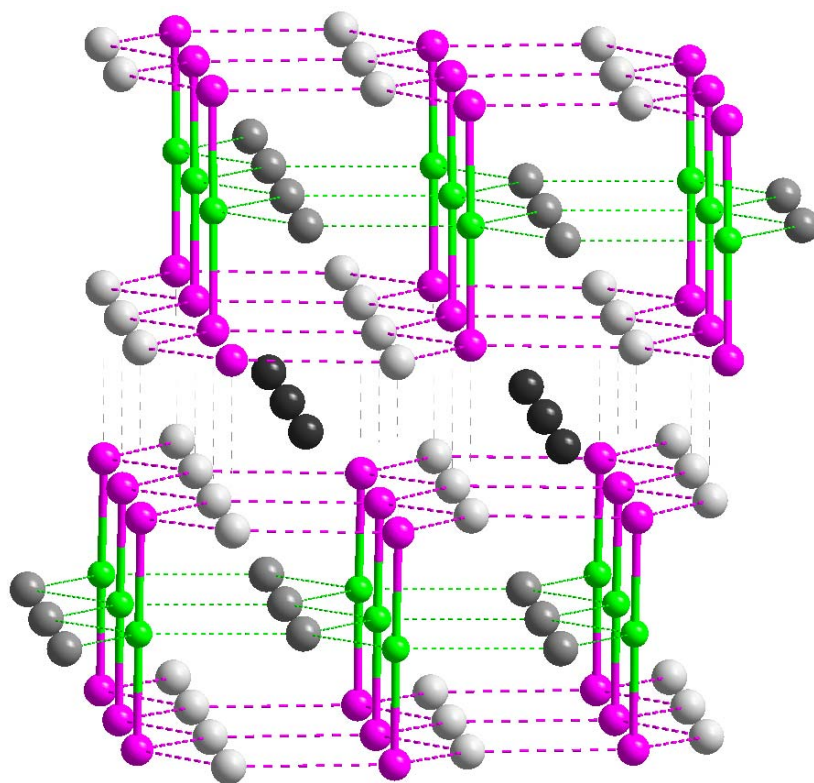

**Fig. S2** Crystal structure of  $K_4ZnBi_2$  built of graphite-like layers composed of  $K_3Zn_3$  and  $K_3Bi_3$  rings, respectively.

### 3. Complete reference 24

M. J. Frisch, G. W. Trucks, H. B. Schlegel, G. E. Scuseria, M. A. Robb, J. R. Cheeseman, J. A. Montgomery, Jr., T. Vreven, K. N. Kudin, J. C. Burant, J. M. Millam, S. S. Iyengar, J. Tomasi, V. Barone, B. Mennucci, M. Cossi, G. Scalmani, N. Rega, G. A. Petersson, H. Nakatsuji, M. Hada, M. Ehara, K. Toyota, R. Fukuda, J. Hasegawa, M. Ishida, T. Nakajima, Y. Honda, O. Kitao, H. Nakai, M. Klene, X. Li, J. E. Knox, H. P. Hratchian, J. B. Cross, V. Bakken, C. Adamo, J. Jaramillo, R. Gomperts, R. E. Stratmann, O. Yazyev, A. J. Austin, R. Cammi, C. Pomelli, J. W. Ochterski, P. Y. Ayala, K. Morokuma, G. A. Voth, P. Salvador, J. J. Dannenberg, V. G. Zakrzewski, S. Dapprich, A. D. Daniels, M. C. Strain, O. Farkas, D. K. Malick, A. D. Rabuck, K. Raghavachari, J. B. Foresman, J. V. Ortiz, Q. Cui, A. G. Baboul, S. Clifford, J. Cioslowski, B. B. Stefanov, G. Liu, A. Liashenko, P. Piskorz, I. Komaromi, R. L. Martin, D. J. Fox, T. Keith, M. A. Al-Laham, C. Y. Peng, A. Nanayakkara, M. Challacombe, P. M. W. Gill, B. Johnson, W. Chen, M. W. Wong, C. Gonzalez and J. A. Pople, Gaussian 03, revision D.02. Gaussian, Inc., Wallingford CT, 2004.
